# Supplementary material for: Molecular characterization of the conoid complex in Toxoplasma reveals its conservation in all apicomplexans, including Plasmodium species
Source: PLOS journal article supplement (doi:10.1371/journal.pbio.3001081), 2021-03-11

# S1\_Raw\_Images supporting gels and blots

Western blot images used for Fig 2: A) chemiluminescent signal for streptavidin-detected biotinylated proteins; B) gel image showing prestained molecular weight markers (M); C) merge of inverted image A on B. Lane numbers; 1, paraental; 2, SAS6L-BirA\*; 3, RNG2-BirA\*; 4, MORN3-BirA\*.

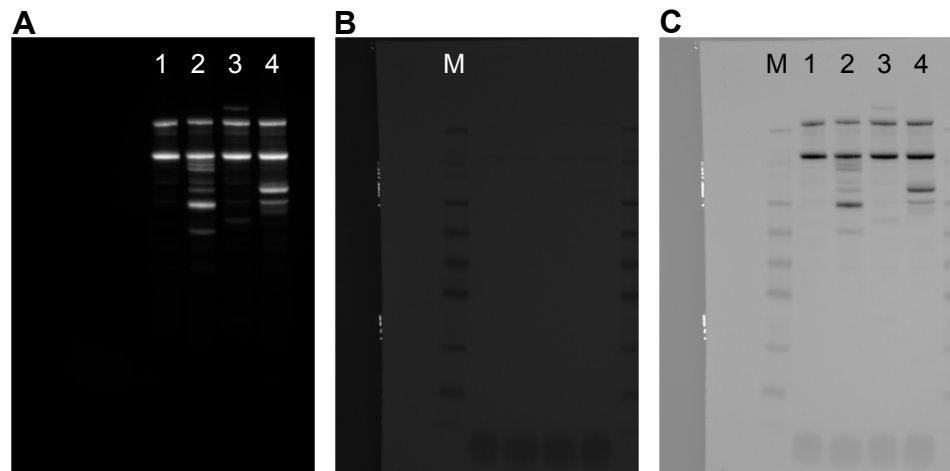

DNA gels used in Fig S9. Gene number is indicated with four corresponding lanes below: Lanes 1 (wildtype control) and 2 (tagged cell line) show PCR results for gene-specific GFP integration, lanes 3 (wildtype control) and 4 (tagged cell line) show positive control PCR. X, indicates lanes not included in Fig S9, and all unboxed lanes are unrelated to this report.

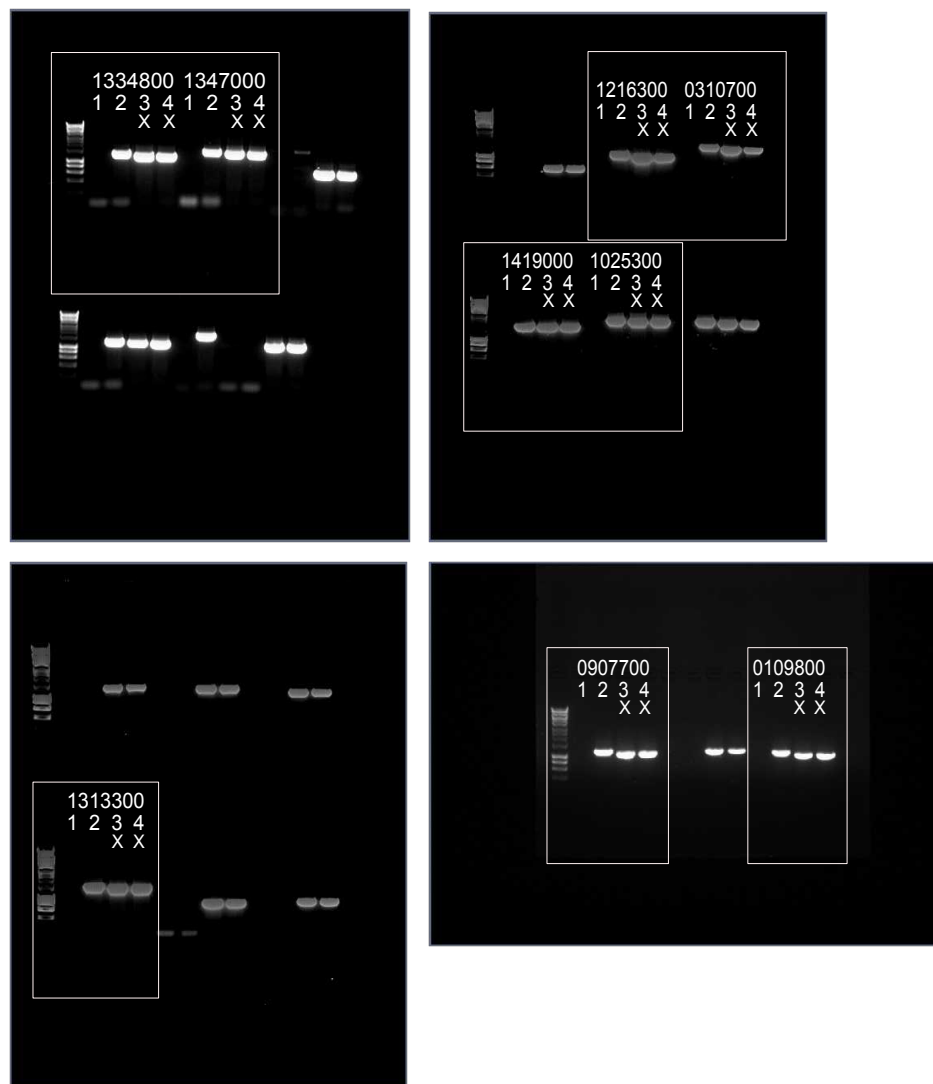

Supplement: S16 (10.1371/journal.pbio.3001081.s016) [file journal.pbio.3001081.s016]
